# Supplementary material for: Human CD79b+ neutrophils in the blood are associated with early-stage melanoma
Source: Front Immunol. 2023 Oct 31;14:1224045. doi: 10.3389/fimmu.2023.1224045 (PMC10643866; doi:10.3389/fimmu.2023.1224045)
Supplement: Supplementary file 5 [file Table_4.xlsx]

## Sheet: Sheet1
Supplementary Table 4. Antibodies for Flow Cytometry and CyTOF
Antibody	Fluorphore/Metal	Clone	Source	Dilution
CD127	113In	A019D5	Biolegend	1:200
CD3	113In	UCHT1	Biolegend	1:200
CD235a	115In	HIR2	Biolegend	1:400
CD41a	115ln	HIP8	Biolegend	1:400
CD11c	141Pr	3.9	Biolegend	1:200
CD11a	142Nd	HI111	Fluidigm	1:200
CD203c	143Nd	NP4D6	Biolegend	1:200
CD123	143Nd	6H6	Fluidigm	1:200
CD19	144Nd	HIB19	Biolegend	1:200
CD62L	145Nd	DREG-56	Biolegend	1:200
CD64	146Nd	10.1	Fluidigm	1:200
CD182	147Sm	5E8/CXCR2	Fluidigm	1:200
CD11b	148Nd	M1/70	Biolegend	1:400
CD48	149Sm	BJ40	Biolegend	1:400
CD49d	151Eu	9F10	Biolegend	1:200
CD66b	152Sm	80H3	Fluidigm	1:200
CD14	153Eu	M5E2	Biolegend	1:400
CD117	154Sm	104D2	Biolegend	1:200
CD45RA	155Gd	HI100	Fluidigm	1:200
CD10	156Gd	HI10a	Fluidigm	1:200
CD101	158Gd	BB27	Fluidigm	1:200
CD197	159Tb	G043H7	Fluidigm	1:200
CD79b	160Gd	CB3-1	BD	1:200
Arg1	161Dy	14D2C43	Biolegend	1:200
CD71	162Dy	CY1G4	Biolegend	1:400
CD86	163Dy	IT2.2	Biolegend	1:200
Siglec 8	164Dy	7C9	Fluidigm	1:200
CD16	165Ho	3G8	Fluidigm	1:200
CD34	166Er	581	Fluidigm	1:200
CD38	167Er	HIT2	Fluidigm	1:200
CD304	168Er	12C2	Biolegend	1:200
CD33	169Tm	WM53	Fluidigm	1:200
CD35	170Er	E11	Biolegend	1:200
HLA-ABC	171Yb	W6/32	Biolegend	1:200
CD15	172Yb	W6D3	Fluidigm	1:200
HLA-DR	174Yb	L243	Biolegend	1:400
CD184	175Lu	12G5	Fluidigm	1:200
CD56	176Yb	R19-760	Fluidigm	1:200
CD45	89Y	HI30	Fluidigm	1:200
CD161	Alexa Fluor 488	HP-3G10	Biolegend	1:100
CD79b	Alexa Fluor 647	CB3-1	Biolegend	1:100
CD45	Alexa Fluor 700	HI30	Biolegend	1:200
CD66b	Alexa Fluor 700	G10F5	Biolegend	1:400
CD19	APC	HIB19	Biolegend	1:400
HLA-DR	APC-Cy7	L243	Biolegend	1:400
IgE	APC-Fire750	MHE-18	Biolegend	1:200
CD169	BB515	7-239	BD	1:200
CD45	BB515	HI30	BD	1:200
CD7	BB515	M-T701	BD	1:400
CD86	BB515	2331 (Fun-1)	BD	1:400
CD34	BV421	561	Biolegend	1:100
IgM	BV421	MHM-88	Biolegend	1:50
Siglec 8	BV421	837535	BD	1:200
IgD	BV510	IA6-2	Biolegend	1:200
CD44	BV605	IM7	Biolegend	1:400
CD86	BV605	2331 (Fun-1)	BD	1:200
CD117	BV711	104D2	Biolegend	1:100
CD117	BV785	104D2	Biolegend	1:50
CD16	BV785	3G8	Biolegend	1:400
MPO	eFluor450	MPO455-8E6	Invitrogen	1:400
CD11c	FITC	3.9	Biolegend	1:200
CD123	FITC	6H6	Biolegend	1:400
CD127	FITC	A019D5	Biolegend	1:200
CD14	FitC	M5E2	Biolegend	1:400
CD19	FITC	4G7	Biolegend	1:200
CD235a	FITC	HI264	Biolegend	1:400
CD3	FITC	HIT3a	Biolegend	1:200
CD41	FITC	HIP8	Biolegend	1:400
CD56	FITC	HCD56	Biolegend	1:200
CD90	FiTC	5E10	Biolegend	1:200
FceRIa	FITC	AER-37 (CRA-1)	Biolegend	1:400
IgG	FITC	M1310G05	Biolegend	1:50
Siglec 8	FITC	7C9	Miltenyi Biotec	1:200
CD66b	PE	G10F5	Biolegend	1:400
CD19	PE-Cy7	HIB19	Biolegend	1:400
CD40	PE-Cy7	5C3	Biolegend	1:400
CD80	PE-Cy7	2D10	Biolegend	1:200
CD203c	PE/Dazzle 594	NP4D6	Biolegend	1:200
Siglec 8	PE/Dazzle 594	7C9	Biolegend	1:200
CD16	PerCP Cy5.5	3G8	Biolegend	1:400
CD3	PerCP Cy5.5	OKT3	Tonbo Bioscience	1:400
CD56	PerCP Cy5.5	HCD56	Biolegend	1:400
Siglec 8	PerCP Cy5.5	7C9	Biolegend	1:100
Live/Dead Fixable Dead Cell Stain	Aqua		Molecular Probes	1:400
Live/Dead Fixable Dead Cell Stain	Blue		Molecular Probes	1:400
Zombie Fixable Viability Kit	NIR		Biolegend	1:400
IdU	127I		Fluidigm	1:1000
